# Supplementary material for: Evolution of the mammalian transcription factor binding repertoire via transposable elements
Source: HighWire-hosted journal article supplement (doi:10.1101/gr.080663.108), 2008-08-05
Supplement: Supp_Material.pdf [file Supp_Material.pdf]

## Supplementary Online Material

### EVOLUTION OF THE MAMMALIAN TRANSCRIPTION FACTOR BINDING REPERTOIRE VIA TRANPOSABLE ELEMENTS

Guillaume Bourque\*, Bernard Leong, Vinsensius B. Vega, Xi Chen, Yen Ling Lee, Kandhadayar G. Srinivasan, Joon-Lin Chew, Yijun Ruan, Chia-Lin Wei, Huck Hui Ng and Edison T. Liu

\*Correspondence: [bourque@gis.a-star.edu.sg](mailto:bourque@gis.a-star.edu.sg)

#### Supplementary Text

##### *Binding motif enrichment extends to homologous neighborhoods*

Motif conservation across multiple species is a powerful way to identify *bona fide* transcription factor binding sites that play important regulatory roles (Wang et al. 2006). But of course, such an assessment will depend on our ability to correctly characterize the sequence motifs that are associated with the binding of the transcription factors. To begin addressing this, we measured the enrichment of predicted binding motifs in the ChIP-PET, ChIP-Chip and ChIP-Seq binding regions. The results for centered windows of size 200, 500, 1000 and 2000 bps are shown in Supplementary Figure 4. Overall, we find that in the smallest windows, the motif enrichment varies from 4.9 fold (ESR1-CC) to 50.5 fold (CTCF). An interesting finding is that although the incremental enrichment remains marginally significant in 500 bps windows it vanishes in larger windows (except for TP53 which has an exceptionally low background). This attests to the accuracy and resolution of the 3 ChIP techniques. The fact that the motif enrichment is inversely correlated with the distance to the center of the binding regions can also be deduced from the distribution of the motifs within the regions (data not shown).

Next, relying on the strength of the motif enrichment, we used the same centered windows to look for motif conservation in other mammalian genomes. For the binding regions identified in human (ESR1, TP53, MYC, RELA), homologous regions in chimpanzee, macaque, mouse and dog were extracted using the tool liftOver and searched for cross-specie *conserved motifs*. For the binding regions identified in mouse (POU5F1-SOX2 and CTCF), a similar approach was used using homologous regions in rat, human and dog. The results displayed in Supplementary Figure 4 show that the fold enrichment for conserved motifs in 200 bps windows ranges from 14 fold for ESR1-CC to 190 fold for CTCF. The additional requirement of looking for motifs in other genomes implies a more stringent background and leads to overall stronger enrichments. What is more interesting is that incremental fold enrichment of conserved motif is no longer restricted to windows of small sizes (Supplementary Figure 4). For instance, using 1 Kbps windows instead of a 500 bps windows allows the recovery of 121 instead of 101 conserved RELA motifs. These 20 additional conserved motifs represent a 3.8 fold enrichment over the expected  $5.26 \pm 1.97$  new conserved motifs and this difference is highly significant (p-value =  $1.5E-12$ ).

### *Overlap between the two conservation metrics*

We were interested in looking at the agreement between the two conservation measures and the overall proportion of conserved binding sites for the different transcription factors. Supplementary Figure 5 displays the proportion of sites that contain a conserved motif only, a conserved element only, both a conserved motif and conserved element or neither. The most flagrant conclusion from this analysis is that the majority of binding regions are not conserved under either metric.

### *Association with Satellite and centromeric repeats*

We found that 89 (13.5%), 39 (6.3%), 16 (4.8%) and 11 (0.9%) of the binding sites of MYC, RELA, TP53 and ESR1 respectively were associated with *Satellite* and *centromeric* repeats as compared to the expected 0.5%. The vast majority ( $127/155 = 82\%$ ) of these binding regions were in pericentromeric regions (i.e. within 5Mb of a centromere) and many were common across the different libraries. Because the current genome assembly is incomplete in pericentromeric regions which are known in particular to be depleted of satellite-rich sequences (She et al. 2004), we believe that the random genomic fragments coming from these regions are overrepresented and lead to misguided binding sites. This reduced binding potential is also corroborated by the lack of sequence binding motifs in those regions. For instance, although 34.5% of the non-satellite repeat MYC binding sites have an Ebox motif, this drops to 4.5% for MYC binding sites associated with satellite repeats. Similarly, the proportion of motif bearing RELA binding sites goes from 48.3% to 0% in the 39 sites that are associated with this class of repeats. For these reasons, we have removed these particular sites from the downstream analyses.

### *ESR1 RABS in ChIP-PET and ChIP-Chip data sets*

When assessing the differences between the output of estrogen receptor (ESR1) binding site maps derived from ChIP-PET (a sequence based assessment) and from ChIP-Chip (a hybridization based assessment) platforms, we observed that there was a significant difference in the identification of binding sites that reside in repeats. The arrays used for ChIP-Chip experiments routinely mask repetitive sequences in the probe regions, whereas the sequence-based assessment in the ChIP-PET strategy is free of this constraint. Thus, although 18% of the ChIP-PET determined ESR1 binding sites contained traces of the MIR repeat, only 11% of the ChIP-Chip binding sites had the same repeat (data not shown).

## Supplementary Figures

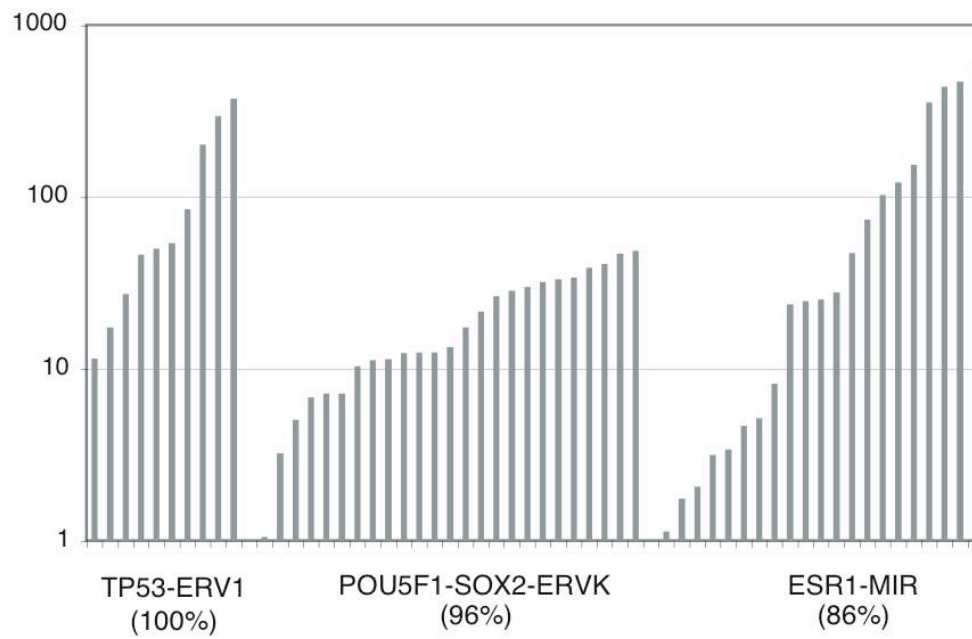

Supplementary Figure 1. ChIP-qPCR fold enrichments of repeat-associated binding sites for TP53, POU5F1-SOX2 and ESR1. Validation rates are computed using a minimum fold-enrichment of 3.

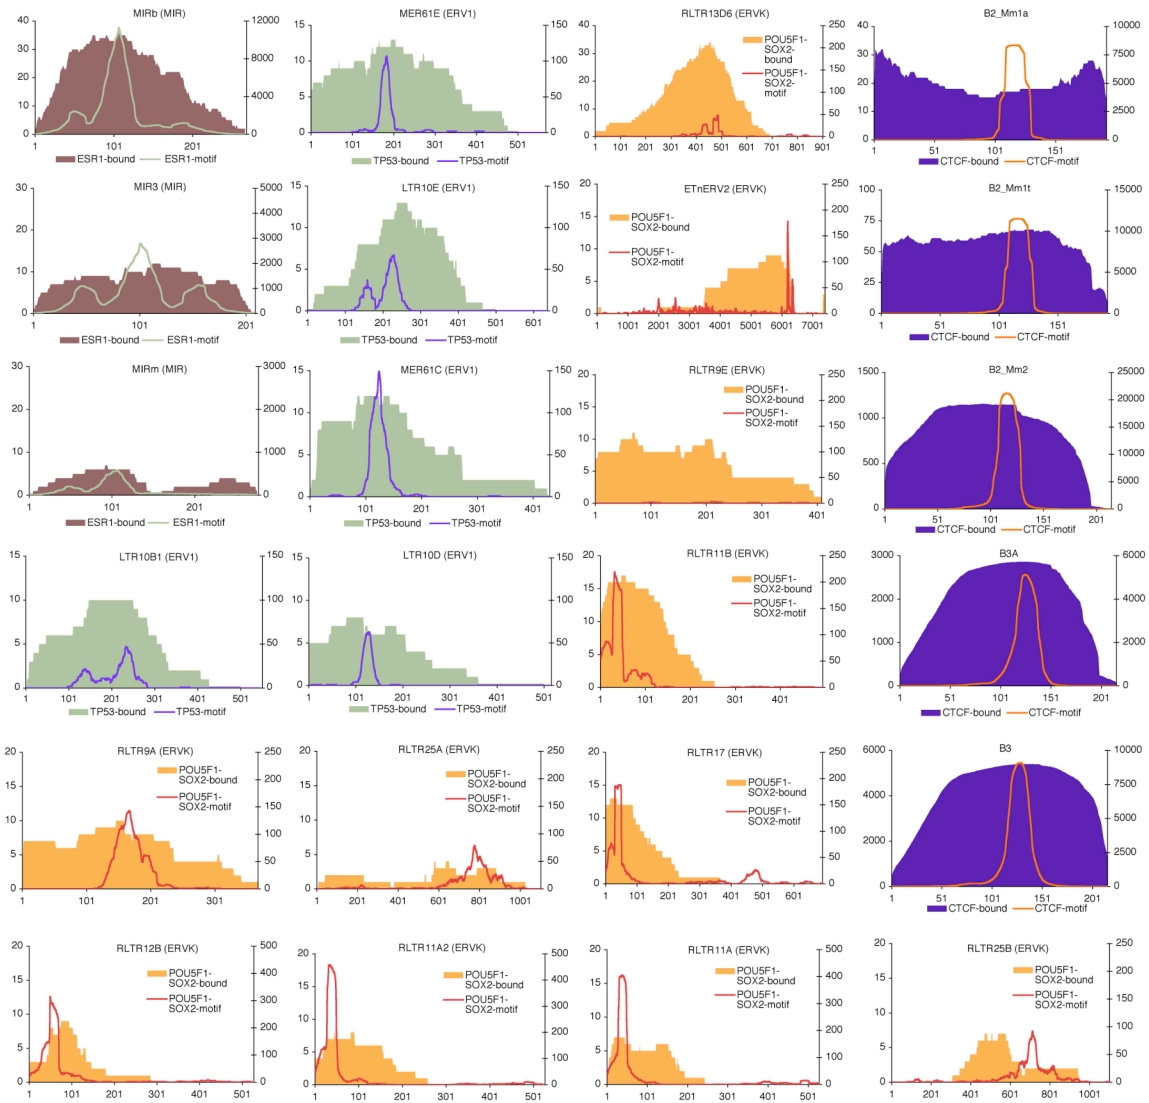

Supplementary Figure 2. Expanded version of Fig. 3A from main text including all over-represented families from Table 1 in the main text.

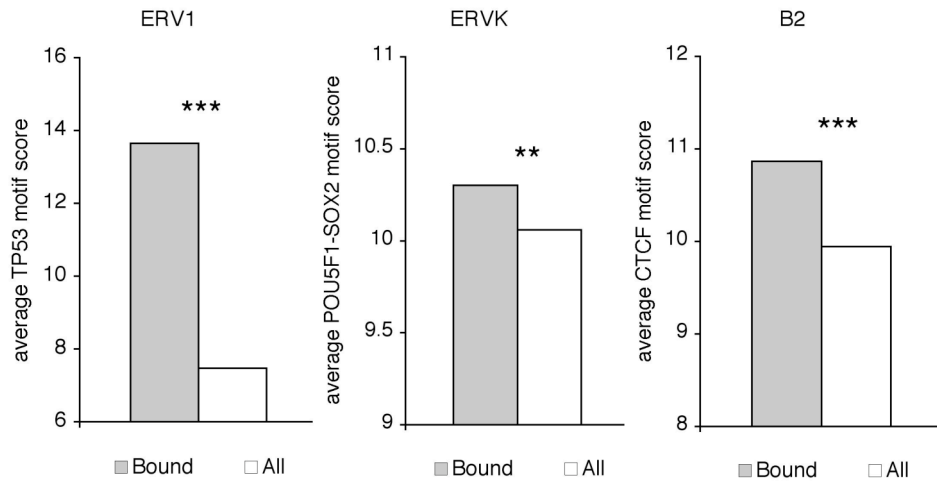

Supplementary Figure 3. Bound transposable elements have better motif instances than the unbound ones. P-values are based on 1000 random samples: \*\*\* implies p-value < 0.001 while \*\* implies p-value < 0.01.

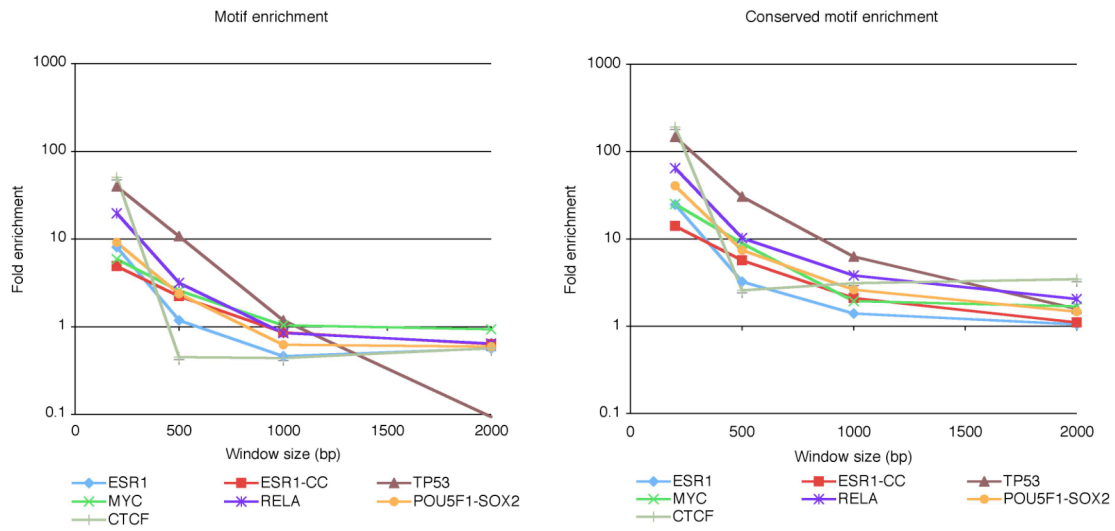

Supplementary Figure 4. Incremental motif enrichment obtained in windows of increasing size (200, 500, 1000 and 2000 bps) centered on the middle of the binding regions identified for ESR1, TP53, MYC, RELA, POU5F1-SOX2 and CTCF. The incremental enrichment is the number of additional motifs detected in a particular window size divided by the expected number of such newly detected motifs. In 200 bps windows all motifs are considered to be new.

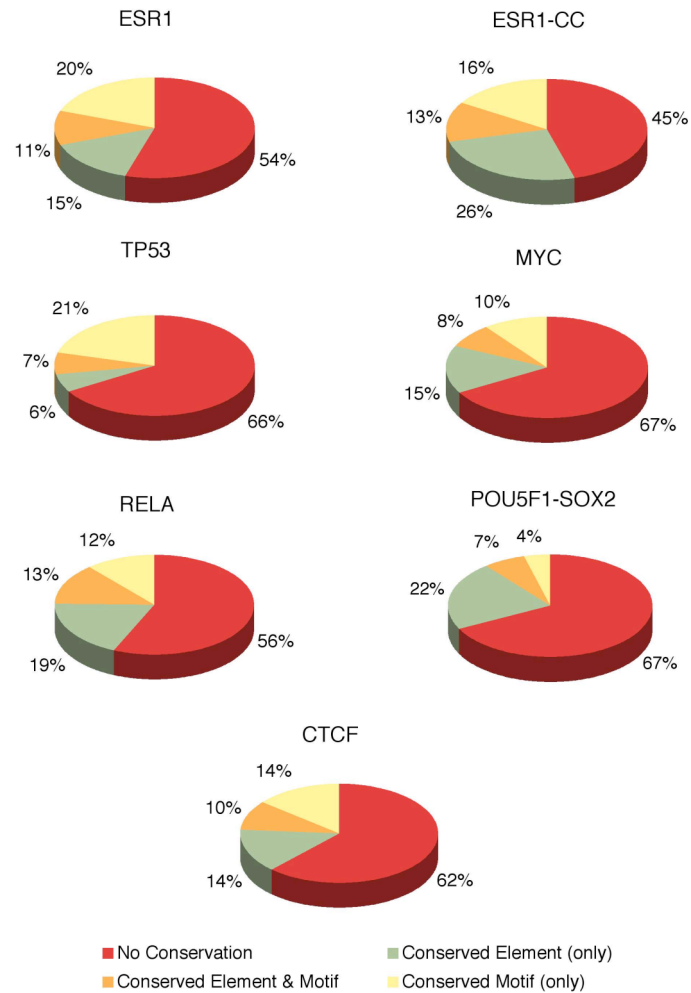

Supplementary Figure 5. Percentage of binding regions overlapping a conserved element (grey), with a conserved motif (yellow), both a conserved element and motif (orange) or with no sequence conservation (red).

## Supplementary Tables

|             | Binding sites | Conserved Element (%) | Conserved Motif (%) | Non-conserved (%) |
|-------------|---------------|-----------------------|---------------------|-------------------|
| ESR1        | 1234          | 25.9                  | 30.6                | 54.6              |
| ESR1-CC     | 3665          | 38.1                  | 28.8                | 45.7              |
| TP53        | 336           | 12.8                  | 27.7                | 66.4              |
| MYC         | 660           | 23.2                  | 18.0                | 66.7              |
| RELA        | 617           | 31.9                  | 24.6                | 56.6              |
| POU5F1-SOX2 | 1507          | 28.4                  | 10.8                | 67.5              |
| CTCF        | 39609         | 24.0                  | 24.0                | 61.9              |

Supplementary Table 1. A majority of binding regions do not show signs of sequence conservation based on either overlap to PhastCons Conserved Elements or presence of conserved binding motifs.

|             | Binding motif (%) | RABS and Binding motif (%) |
|-------------|-------------------|----------------------------|
| ESR1        | 61.1              | 60.7                       |
| TP53        | 84.2              | 97.2                       |
| POU5F1-SOX2 | 44.1              | 55.9                       |
| CTCF        | 68.8              | 78.3                       |

Supplementary Table 2. Percentage of binding regions and repeat-associated binding regions (RABS) that have a binding motif.



|             | Repeat Name | Hamming distance of the best site | Promoters with comparable or better motif (%) |
|-------------|-------------|-----------------------------------|-----------------------------------------------|
| ESR1        | MIRb        | 0                                 | 8.7                                           |
|             | MIR3        | 1                                 | 45.3                                          |
|             | MIRm        | 0                                 | 9.0                                           |
| TP53        | MER61E      | 0                                 | 3.9                                           |
|             | LTR10E      | 2                                 | 95.9                                          |
|             | MER61C      | 0                                 | 2.8                                           |
|             | LTR10D      | 1                                 | 33.8                                          |
|             | LTR10B1     | 0                                 | 3.7                                           |
|             | RLTR13D6    | 2                                 | 97.7                                          |
|             | ETnERV2     | 1                                 | 99.5                                          |
| POU5F1-SOX2 | RLTR9E      | 3                                 | 98.2                                          |
|             | RLTR11B     | 0                                 | 2.9                                           |
|             | RLTR17      | 0                                 | 6.6                                           |
|             | RLTR9A      | 2                                 | 80.2                                          |
|             | RLTR12B     | 0                                 | 3.4                                           |
|             | RLTR11A2    | 0                                 | 3.4                                           |
|             | RLTR11A     | 0                                 | 3.4                                           |
|             | RLTR25B     | 0                                 | 9.6                                           |
|             | RLTR25A     | 0                                 | 10.2                                          |
| CTCF        | B2_Mm1a     | 0                                 | 3.6                                           |
|             | B2_Mm1t     | 0                                 | 3.6                                           |
|             | B2_Mm2      | 0                                 | 3.7                                           |
|             | B3          | 0                                 | 3.7                                           |
|             | B3A         | 0                                 | 4.0                                           |

Supplementary Table 3. Consensus sequences of the bound repeats were found to be better progenitors of binding motifs. We measured the hamming distance of the best site in each repeat consensus (as a proxy of the minimum mutational events required to generate a binding motif) and calculated the fraction of promoters in the whole genome that contain similar or closer sequences to the binding motif.

|      | Repeat<br>Subfamily | Age<br>(Myrs)<br>Jukes<br>Cantor | Age (Myrs)<br>Kimura | Age<br>(Myrs)<br>PAML<br>(w/o GC) | Age<br>(Myrs)<br>PAML<br>(with GC) |
|------|---------------------|----------------------------------|----------------------|-----------------------------------|------------------------------------|
| SINE | MIR3                | 172                              | 166                  | 130                               | 135                                |
|      | MIRb                | 170                              | 168                  | 126                               | 136                                |
|      | MIRm                | 163                              | 161                  | 127                               | 134                                |
| ERV1 | LTR10B1             | 96                               | 92                   | 78                                | 81                                 |
|      | LTR10D              | 57                               | 71                   | 46                                | 56                                 |
|      | LTR10E              | 65                               | 75                   | 57                                | 64                                 |
|      | MER61C              | 78                               | 68                   | 59                                | 65                                 |
|      | MER61E              | 84                               | 85                   | 60                                | 68                                 |
| ERVK | ETnERV2             | 47                               | 38                   | 29                                | 32                                 |
|      | RLTR9A              | 52                               | 50                   | 39                                | 43                                 |
|      | RLTR9B              | 37                               | 36                   | 27                                | 32                                 |
|      | RLTR11A             | 52                               | 47                   | 43                                | 44                                 |
|      | RLTR11A2            | 55                               | 53                   | 40                                | 46                                 |
|      | RLTR11B             | 52                               | 49                   | 40                                | 43                                 |
|      | RLTR12B             | 67                               | 60                   | 31                                | 53                                 |
|      | RLTR13D6            | 41                               | 39                   | 31                                | 34                                 |
|      | RLTR17              | 50                               | 47                   | 33                                | 40                                 |
|      | RLTR25A             | 53                               | 48                   | 38                                | 41                                 |
|      | RLTR25B             | 54                               | 48                   | 39                                | 42                                 |
| B2   | B2_Mm1a             | 13                               | 15                   | 11                                | 13                                 |
|      | B2_Mm1t             | 19                               | 22                   | 16                                | 19                                 |
|      | B2_Mm2              | 25                               | 27                   | 22                                | 24                                 |
|      | B3                  | 60                               | 61                   | 44                                | 51                                 |
|      | B3A                 | 69                               | 68                   | 49                                | 57                                 |

Supplementary Table 4: The age of a repeat subfamily computed using the RepeatMasker data using three methods: (i) Jukes Cantor using the divergence statistic in RepeatMasker, (ii) Kimura 2-distance using the transitions and transversions in RepeatMasker, and (iii) Divergence computed from PAML using sequence data with and without masking GC content.

|                 | Repeat Name | Nb<br>repeats | Observed<br>motifs /<br>repeat | Expected<br>motifs /<br>repeat | p-value |
|-----------------|-------------|---------------|--------------------------------|--------------------------------|---------|
| ESR1            | MIRb*       | 280513        | 0.058                          | 0.095                          | 1       |
|                 | MIR3*       | 72027         | 0.050                          | 0.060                          | 0.964   |
|                 | MIRm*       | 32126         | 0.017                          | 0.046                          | 1       |
| TP53            | MER61E      | 320           | 0.400                          | 0.428                          | 0.961   |
|                 | LTR10E      | 253           | 0.672                          | 0.013                          | < 0.001 |
|                 | MER61C      | 288           | 0.674                          | 0.579                          | < 0.001 |
|                 | LTR10D      | 190           | 0.395                          | 0.063                          | < 0.001 |
|                 | LTR10B1     | 238           | 0.563                          | 0.418                          | < 0.001 |
|                 | RLTR13D6    | 1239          | 0.091                          | 0.018                          | < 0.001 |
|                 | ETnERV2     | 4491          | NA                             | NA                             | NA      |
| POU5F1-<br>SOX2 | RLTR9E      | 1402          | 0.005                          | 0.001                          | 0.003   |
|                 | RLTR11B     | 1944          | 0.208                          | 0.138                          | < 0.001 |
|                 | RLTR17      | 2642          | 0.156                          | 0.095                          | < 0.001 |
|                 | RLTR9A      | 1652          | 0.184                          | 0.006                          | < 0.001 |
|                 | RLTR12B     | 907           | 0.684                          | 0.238                          | < 0.001 |
|                 | RLTR11A2    | 3101          | 0.236                          | 0.121                          | < 0.001 |
|                 | RLTR11A     | 2897          | 0.228                          | 0.091                          | < 0.001 |
|                 | RLTR25B     | 4322          | 0.099                          | 0.046                          | < 0.001 |
|                 | RLTR25A     | 3179          | 0.142                          | 0.069                          | < 0.001 |
| CTCF            | B2_Mm1a*    | 17753         | 0.487                          | 0.477                          | 0.164   |
|                 | B2_Mm1t*    | 22203         | 0.535                          | 0.511                          | 0.015   |
|                 | B2_Mm2*     | 85463         | 0.278                          | 0.299                          | 0.989   |
|                 | B3*         | 140073        | 0.058                          | 0.096                          | 1       |
|                 | B3A*        | 87707         | 0.057                          | 0.065                          | 0.928   |

Supplementary Table 5. Repeat instances are significantly enriched for binding motifs. The computation of expected motif was carried out through 1000 Monte Carlo simulation of random mutations, taking into account the length and amount of substitution in each repeat instance. \*For these large families, the analysis is based on a sampling of 2000 repeat instances.

|                 | Repeat name | Total motifs<br>(nb) | Bound<br>motifs (nb) | Bound<br>motifs (%) |
|-----------------|-------------|----------------------|----------------------|---------------------|
| ESR1            | MIR3        | 7185                 | 15                   | 0.21                |
|                 | MIRb        | 24202                | 46                   | 0.19                |
|                 | MIRm        | 1433                 | 6                    | 0.42                |
|                 | <i>MIR</i>  | 48869                | 91                   | 0.19                |
|                 | Random (1M) | 30104                | 53                   | 0.18                |
| TP53            | MER61E      | 142                  | 22                   | 15.49               |
|                 | LTR10E      | 171                  | 41                   | 23.98               |
|                 | MER61C      | 199                  | 17                   | 8.54                |
|                 | LTR10D      | 75                   | 11                   | 14.67               |
|                 | LTR10B1     | 137                  | 21                   | 15.33               |
|                 | <i>ERV1</i> | 9001                 | 143                  | 1.59                |
|                 | Random (1M) | 6053                 | 10                   | 0.17                |
| POU5F1-<br>SOX2 | RLTR13D6    | 116                  | 4                    | 3.45                |
|                 | ETnERV2     | 1189                 | 12                   | 1.01                |
|                 | RLTR9E      | 9                    | 0                    | 0.00                |
|                 | RLTR11B     | 428                  | 14                   | 3.27                |
|                 | RLTR17      | 413                  | 7                    | 1.69                |
|                 | RLTR9A      | 310                  | 6                    | 1.94                |
|                 | RLTR12B     | 621                  | 8                    | 1.29                |
|                 | RLTR11A2    | 735                  | 6                    | 0.82                |
|                 | RLTR11A     | 661                  | 6                    | 0.91                |
|                 | RLTR25B     | 458                  | 6                    | 1.31                |
|                 | RLTR25A     | 454                  | 11                   | 2.42                |
|                 | <i>ERVK</i> | 16145                | 104                  | 0.64                |
|                 | Random (1M) | 12609                | 25                   | 0.20                |
| CTCF            | B2_Mm1a     | 8684                 | 14                   | 0.16                |
|                 | B2_Mm1t     | 12057                | 59                   | 0.49                |
|                 | B2_Mm2      | 22971                | 993                  | 4.32                |
|                 | B3A         | 6438                 | 2200                 | 34.17               |
|                 | B3          | 11309                | 4050                 | 35.81               |
|                 | B2          | 61459                | 7316                 | 11.90               |
|                 | Random (1M) | 4491                 | 353                  | 7.86                |

Supplementary Table 6. Repeat instances are enriched for bound motifs. Expected levels where measured in a sample of 1 million random positions from the corresponding genome.

| POU5F1-SOX2<br>RABS | Gene name     | Affymetrix ID | Relative<br>Position | Distance |
|---------------------|---------------|---------------|----------------------|----------|
| chr7.114695151      | Sept1         | 1449898_at    | 5'                   | 5999     |
| chr11.106395678     | Pecam1        | 1421287_a_at  | 5'                   | 9451     |
| chr3.89063382       | Ubqln4        | 1448691_at    | 3'                   | 2392     |
| chr5.75600278       | A730073F16Rik | 1419824_a_at  | 3'                   | 6617     |
| chr1.17034092       | NA            | 1437867_at    | 3'                   | 7450     |
| chr17.27381418      | Mapk13        | 1448871_at    | 3'                   | 8505     |
| chr17.45878480      | Frs3          | 1424449_at    | 3'                   | 9124     |
| chr12.4786805       | Ubx4          | 1425020_at    | inside               | 8914     |
| chr2.160719756      | Top1          | 1423474_at    | inside               | 10558    |
| chr10.6059645       | Akap12        | 1419706_a_at  | inside               | 23858    |
| chr10.61111717      | X99384        | 1448134_at    | inside               | 32474    |
| chrX.67386874       | Pls3          | 1423725_at    | inside               | 44506    |
| chrX.21651446       | Klhl13        | 1448269_a_at  | inside               | 45939    |
| chr3.136093140      | Manba         | 1450626_at    | inside               | 60936    |
| chr1.164394053      | Nme7          | 1418217_at    | inside               | 69074    |
| chr4.144685145      | Rex2          | 1426137_at    | inside               | 70612    |
| chr10.108082996     | Pawr          | 1426910_at    | inside               | 71287    |
| chr1.34386946       | Dst           | 1423626_at    | inside               | 92177    |

Supplementary Table 7. Repeat associated POU5F1-SOX2 binding sites within 10Kb of an POU5F1 or SOX2 regulated genes from (Ivanova et al. 2006).

| ESR1 RABS      | Gene Name | Affymetrix ID | Relative Position | Distance |
|----------------|-----------|---------------|-------------------|----------|
| chr19.52531896 | GPR77     | 221149_at     | 5'                | 115      |
| chr10.51217192 | MSMB      | 207430_s_at   | 5'                | 2063     |
| chr9.129597065 | PTGES     | 210367_s_at   | 5'                | 2829     |
| chr9.92913871  | SUSD3     | 227182_at     | 5'                | 3619     |
| chr20.48776387 | PARD6B    | 211907_s_at   | 5'                | 4203     |
| chr5.139002858 | CXXC5     | 224516_s_at   | 5'                | 4836     |
| chr15.61465657 | CA12      | 203963_at     | 5'                | 6048     |
| chr20.4555301  | NCOA3     | 209060_x_at   | 5'                | 7800     |
| chr3.50617320  | CISH      | 223961_s_at   | 3'                | 1517     |
| chr12.96464503 | NCRMS     | 229782_at     | 3'                | 3852     |
| chr3.151937578 | SIAH2     | 209339_at     | 3'                | 3998     |
| chr16.8787729  | ABAT      | 206527_at     | 3'                | 5041     |
| chr9.4855810   | RCL1      | 218544_s_at   | 3'                | 5383     |
| chr17.55279697 | VMP1      | 224917_at     | 3'                | 5518     |
| chr1.203456894 | TOSO      | 221601_s_at   | 3'                | 8884     |
| chr4.89597068  | HERC6     | 244760_at     | inside            | 2359     |
| chr20.57995993 | CDH26     | 232306_at     | inside            | 5416     |
| chr20.52106704 | BCAS1     | 204378_at     | inside            | 10265    |
| chr3.14429456  | SLC6A6    | 205921_s_at   | inside            | 10467    |
| chr17.70268412 | SLC9A3R1  | 201349_at     | inside            | 12213    |
| chr20.34646533 | TGIF2     | 218724_s_at   | inside            | 13780    |
| chr16.8678085  | ABAT      | 206527_at     | inside            | 15240    |
| chr4.89612975  | HERC6     | 244760_at     | inside            | 18400    |
| chr15.69374273 | FLJ13710  | 222835_at     | inside            | 19746    |
| chr8.11625631  | GATA4     | 205517_at     | inside            | 22806    |
| chr11.35366420 | SLC1A2    | 208389_s_at   | inside            | 28973    |
| chr1.21710558  | RAP1GA1   | 203911_at     | inside            | 30297    |
| chr11.30499246 | C11orf8   | 205413_at     | inside            | 58681    |
| chr20.19212066 | SLC24A3   | 219090_at     | inside            | 70780    |
| chr14.88004385 | PTPN21    | 1320_at       | inside            | 81200    |
| chr5.142679813 | NR3C1     | 201865_x_at   | inside            | 82602    |
| chr20.52030817 | BCAS1     | 204378_at     | inside            | 87366    |
| chr11.30416645 | C11orf8   | 205413_at     | inside            | 141647   |
| chr17.56663045 | BCAS3     | 220488_s_at   | inside            | 241182   |
| chr17.56765385 | BCAS3     | 220488_s_at   | inside            | 343904   |
| chr17.56797790 | BCAS3     | 220488_s_at   | inside            | 377662   |
| chr16.77628669 | WWOX      | 219077_s_at   | inside            | 938164   |

Supplementary Table 8. Repeat associated ESR1 binding sites within 10Kb of an ESR1 regulated genes from (Lin et al. 2007).

Supplementary Table 9. ESR1 binding sites (see file Table\_S9\_ESR1\_binding.tsv).

Supplementary Table 10. ESR1-CC binding sites (see file Table\_S10\_ESR1CC\_binding.tsv).

Supplementary Table 11. TP53 binding sites (see file Table\_S11\_TP53\_binding.tsv).

Supplementary Table 12. MYC binding sites (see file Table\_S12\_MYC\_binding.tsv).

Supplementary Table 13. RELA binding sites (see file Table\_S13\_RELA\_binding.tsv).

Supplementary Table 14. POU5F1-SOX2 binding sites (see file Table\_S14\_O4S2\_binding.tsv).

Supplementary Table 15. CTCF binding sites (see file Table\_S15\_CTCF\_binding\_wBarski.tsv).

### Supplementary References

- Ivanova, N., R. Dobrin, R. Lu, I. Kotenko, J. Levorse, C. DeCoste, X. Schafer, Y. Lun, and I.R. Lemischka. 2006. Dissecting self-renewal in stem cells with RNA interference. *Nature* **442**: 533-538.
- Lin, C.Y., V.B. Vega, J.S. Thomsen, T. Zhang, S.L. Kong, M. Xie, K.P. Chiu, L. Lipovich, D.H. Barnett, F. Stossi et al. 2007. Whole-Genome Cartography of Estrogen Receptor alpha Binding Sites. *PLoS Genet* **3**: e87.
- She, X., J.E. Horvath, Z. Jiang, G. Liu, T.S. Furey, L. Christ, R. Clark, T. Graves, C.L. Gulden, C. Alkan et al. 2004. The structure and evolution of centromeric transition regions within the human genome. *Nature* **430**: 857-864.
- Wang, H., Y. Zhang, Y. Cheng, Y. Zhou, D.C. King, J. Taylor, F. Chiaromonte, J. Kasturi, H. Petrykowska, B. Gibb et al. 2006. Experimental validation of predicted mammalian erythroid cis-regulatory modules. *Genome Res* **16**: 1480-1492.
